# Supplementary material
Source: PubMed Central journal article supplement (PMC7253327)
Supplement: NIHMS1585913-supplement-Bing_Xue_removal.pdf [file NIHMS1585913-supplement-Bing_Xue_removal.pdf]

**From:** Bing Xue  
**To:** [Erinn Cain](#)  
**Subject:** Fwd: FW: STROKE/2019/028744R2: Request Final Files  
**Date:** Thursday, April 16, 2020 2:49:18 PM

---

\*\*\* **CAUTION:** This email originated from outside of the **American Heart Association**. Do **not** click links or open attachments unless you recognize the sender and know the content is safe. \*\*\*

Hi Erinn,

I agree to be removed as an author.

Thanks,  
Bing

----- Forwarded message -----

**From:** **Strahle, Jennifer** <[strahlej@wustl.edu](mailto:strahlej@wustl.edu)>  
**Date:** Thu, Apr 16, 2020 at 12:29 AM  
**Subject:** FW: STROKE/2019/028744R2: Request Final Files  
**To:** Bing Xue <[xbthomas@gmail.com](mailto:xbthomas@gmail.com)>

Hi Bing,

Are you able to respond via email to Erinn Cain?

Thanks,

Jenn

Jennifer Strahle, M.D.

Assistant Professor of Neurosurgery,

Orthopedic Surgery and Pediatrics

Washington University in St. Louis

St. Louis Children's Hospital

[strahlej@wustl.edu](mailto:strahlej@wustl.edu)

cell: 201-638-6919

office: 314-454-4630

---

**From:** "[erinn.cain@heart.org](mailto:erinn.cain@heart.org)" <[erinn.cain@heart.org](mailto:erinn.cain@heart.org)>  
**Reply-To:** "[erinn.cain@heart.org](mailto:erinn.cain@heart.org)" <[erinn.cain@heart.org](mailto:erinn.cain@heart.org)>  
**Date:** Wednesday, April 15, 2020 at 8:07 AM  
**To:** Jennifer Strahle <[strahlej@wustl.edu](mailto:strahlej@wustl.edu)>  
**Subject:** STROKE/2019/028744R2: Request Final Files

**\* External Email - Caution \***

April 15, 2020

STROKE/2019/028744R2

Dear Dr. Strahle,

Thank you for uploading your final files. There is one remaining point that needs to be addressed before your manuscript is ready to send to production.

Because the author order has changed from the original submission, a Change of Authorship form, signed by all authors, is required. The form is available at:  
[https://www.ahajournals.org/pb-assets/migration/Stroke\\_WebImages/COA-1529339236160.pdf](https://www.ahajournals.org/pb-assets/migration/Stroke_WebImages/COA-1529339236160.pdf)

Thank you for providing correspondence from Dakota DeFreitas agreeing to removed as an author. Please also provide a letter signed by Bing Xue agreeing to be removed as an author.

We understand it may take some time to collect the signatures, but if you are able to provide this documentation by the end of the week, we will be able to include your manuscript in the upcoming issue. You may upload the documentation to the manuscript or email it to me.

Please click the link below to upload your best and final files. The files are needed before your manuscript can enter the production cycle. Before uploading files, please read the upload instructions carefully.

[https://stroke-submit.aha-journals.org/cgi-bin/main.plex?  
l=A7Hn3CeZI4C1BL0T6BS1A9ftdS6ESF6Z6jZzgHfYRN9Vd6wZ](https://stroke-submit.aha-journals.org/cgi-bin/main.plex?l=A7Hn3CeZI4C1BL0T6BS1A9ftdS6ESF6Z6jZzgHfYRN9Vd6wZ)

If you have any questions, feel free to contact me at [erinn.cain@heart.org](mailto:erinn.cain@heart.org).

Sincerely,

Erinn Cain  
Assistant Managing Editor  
Stroke

---

The materials in this message are private and may contain Protected Healthcare Information or other information of a sensitive nature. If you are not the intended recipient, be advised that any unauthorized use, disclosure, copying or the taking of any action in reliance on the contents of this information is strictly prohibited. If you have received this email in error, please immediately notify the sender via telephone or return mail.
